1 **Article Summary Line:** Molecular detection of Dengue virus type 2 Cosmopolitan genotype in South America

2

3 **Running Title:** Genomic monitoring of DENV in South America

4

5 **Dengue-2 Cosmopolitan genotype detection and emergence in South America.**

6

7 Marta Giovanetti<sup>1,2,3\*</sup>, Luiz Augusto Pereira<sup>4\*</sup>, Gilberto A. Santiago<sup>5\*</sup>, Vagner Fonseca<sup>6\*</sup>, Maria Paqueta García  
8 Mendoza<sup>7\*</sup>, Carla de Oliveira<sup>1\*</sup>, Laise de Moraes<sup>8</sup>, Joilson Xavier<sup>2</sup>, Stephane Tosta<sup>2</sup>, Hegger Fristch<sup>2</sup>, Emerson  
9 de Castro Barbosa<sup>9</sup>, Evandra Strazza Rodrigues<sup>10</sup>, Dana Figueroa-Romero<sup>7</sup>, Carlos Padilla-Rojas<sup>7</sup>, Omar  
10 Cáceres-Rey<sup>7</sup>, Ana Flávia Mendonça<sup>4</sup>, Fernanda de Bruycker Nogueira<sup>1</sup>, Rivaldo Venancio da Cunha<sup>11</sup>, Ana  
11 Maria Bispo de Filippis<sup>1</sup>, Carla Freitas<sup>12</sup>, Cassio Roberto Leonel Peterka<sup>13</sup>, Carlos Frederico Campelo de  
12 Albuquerque<sup>6</sup>, Leticia Franco<sup>14</sup>, Jairo Andrés Méndez Rico<sup>14</sup>, Jorge L. Muñoz-Jordán<sup>5^</sup>, Vinícius Lemes da  
13 Silva<sup>4^</sup>, Luiz Carlos Junior Alcantara<sup>1,2^</sup>

14

15 **Affiliations:** <sup>1</sup>Laboratório de Flavivírus, Instituto Oswaldo Cruz, Fundação Oswaldo Cruz, Rio de Janeiro, Rio  
16 de Janeiro, Brazil; <sup>2</sup>Laboratório de Genética Celular e Molecular, Instituto de Ciências Biológicas, Universidade  
17 Federal de Minas Gerais, Belo Horizonte, Minas Gerais, Brazil; <sup>3</sup>Department of Science and Technology for  
18 Humans and the Environment, University of Campus Bio-Medico di Roma, Rome, Italy; <sup>4</sup>Laboratório Central  
19 de Saúde Pública Dr. Giovanni Cysneiros, Goiânia, Goiás, Brazil; <sup>5</sup>Centers for Disease Control and Prevention,  
20 Division of Vector-Borne Diseases, Dengue Branch, San Juan, Puerto Rico, United States of America;  
21 <sup>6</sup>Organização Pan-Americana da Saúde/Organização Mundial da Saúde, Brasília, Distrito Federal, Brazil;  
22 <sup>7</sup>Laboratorio de Referencia Nacional Metaxenicas Virales, Instituto Nacional de Salud, Lima Perú; <sup>8</sup>Laboratório  
23 de Enfermidades Infecciosas Transmitidas por Vetores, Instituto Gonçalo Moniz, Fundação Oswaldo Cruz,  
24 Salvador, Bahia, Brazil; Programa de Pós-graduação em Ciências da Saúde, Faculdade de Medicina da Bahia,  
25 Universidade Federal da Bahia, Salvador, Bahia, Brazil; <sup>9</sup>Laboratório Central de Saúde Pública do Estado de  
26 Minas Gerais, Fundação Ezequiel Dias, Belo Horizonte, Minas Gerais, Brazil; <sup>10</sup>University of São Paulo,  
27 Ribeirão Preto Medical School, Blood Center of Ribeirão Preto, Ribeirão Preto, SP, Brazil; <sup>11</sup>Fundação Oswaldo  
28 Cruz, Bio-Manguinhos, Rio de Janeiro, Rio de Janeiro, Brazil; <sup>12</sup>Coordenação Geral de Laboratórios de Saúde  
29 Pública/Secretaria de Vigilância em Saúde, Ministério da Saúde (CGLAB/SVS-MS) Brasília, Distrito Federal,  
30 Brazil; <sup>13</sup>Coordenação Geral das Arboviroses, Secretaria de Vigilância em Saúde/Ministério da Saúde

(CGARB/SVS-MS), Brasília, Distrito Federal, Brazil; <sup>14</sup>Pan American Health Organization/World Health Organization, Washington, DC, USA.

33

**Keywords:** Dengue virus, Cosmopolitan genotype, genomic monitoring, Brazil, South America

35

<sup>^</sup>Denotes equal contribution

37

**\*Correspondence to:** Luiz Carlos Júnior Alcantara, [luiz.alcantara@ioc.fiocruz.br](mailto:luiz.alcantara@ioc.fiocruz.br)

39

## 40 Abstract

We report the first confirmed case of DENV-2 Cosmopolitan genotype isolated from a male patient from Aparecida de Goiania, Goiás state, Midwest Brazil. Using nanopore sequencing, and phylogenetic analyses our findings provide the first preliminary insight regarding the introduction of this emerging genotype in Brazil and South America.

45

## 46 Text

Dengue virus (DENV), a single-stranded positive-sense RNA virus with a genome of ~11,000 kb, is a flavivirus belonging to the *Flaviviridae* family (genus *Flavivirus*) that is transmitted by *Aedes aegypti* and *Ae. albopictus* mosquitos (1). It has caused significant burden and numerous epidemics of mild and severe dengue in the Americas, particularly during recent decades (1). Its diversity can be divided into four antigenically distinct DENV serotypes (DENV-1-4), presenting an inter-serotype nucleotide variability of approximately 30% (2). Each serotype is further subdivided into several phylogenetically distinct genotypes often named according to their geographic origin or other nomenclature, even though some of them have spread to other regions in the past few decades (2). During the past epidemics, DENV outbreaks in Brazil and South America were mainly driven by the circulation of DENV-1-2 serotypes (3,4). Among them, DENV-2 contributes substantially to the dengue burden and dengue-related mortality in the region. DENV-2 includes five distinct non-sylvatic genotypes. Circulation of the Asian I and Asian II genotypes (also labelled as DENV-2 genotype IV)

is mostly circumscribed to the Asian continent. The Asian/American genotype, also known as Southeast Asian-American or genotype III, replaced the American genotype (also known as DENV-2 genotype I) in the 80's (5). The Cosmopolitan genotype (also known as DENV-2 genotype II), is the most wide-spread and genetically heterogeneous genotype, currently circulating in Asia, Middle East, Pacific, and Africa contributing substantially to the dengue burden globally (6). The global dispersal of this genotype may have driven the extensive intra-genotypic diversity, potentially favoring the capacity for wide-spread expansion (6). Cosmopolitan lineages continue to expand geographically, with recent new introductions reported globally, such as in Asia and Africa (7,8). In the Americas, Cosmopolitan genotype reached Peru at the beginning of 2019, spreading mainly along the year in Madre de Dios province, where 4,893 total dengue cases were reported in 2019 (9). However, after its first detection, much is still unknown about its genomic diversity, evolution and transmission dynamics in the region. Since each genotype might be able to lead to a differential clinical outcome and an enhanced virus dispersal, surveillance of circulating strains is pivotal to public health preparedness (5).

Here we report the first confirmed case of DENV-2 Cosmopolitan genotype in Goiás state, a well-connected city located in the Midwestern Brazilian region. We further combined mobile genomic sequencing and phylogenetics to provide the first preliminary insights regarding the transmission dynamics of this novel genotype to the Americas. Considering the potential of this genotype to spread within the region, we advocate for a shift to active surveillance to ensure adequate control of any potential outbreak of this genotype across the Americas.

## *The Study*

A male patient, from the Municipality of Aparecida de Goiânia, located in the state of Goiás, Midwest Brazil, presented symptoms (fever, myalgia, nausea retroorbital pain, back pain headache) compatible with arbovirus infections in late November, 2021. A serum sample was collected for molecular diagnosis and sent to the respective Central Public Health Laboratory of Goiás (GO), for molecular

85 screening. Viral RNA was extracted using the QIAmp Viral RNA Mini Kit (Qiagen) and tested by  
 86 RT-qPCR for arboviral detection (including ZIKV, CHIKV, DENV1-4 and YFV). Molecular testing  
 87 confirmed DENV-2 infection. To quickly identify the DENV genotype, as part of an active arboviral  
 88 real-time monitoring effort in collaboration with the Brazilian public health laboratories, genome  
 89 sequencing was conducted using the Nanopore technology. Briefly, viral RNA was submitted to a  
 90 cDNA synthesis protocol using ProtoScript II First Strand cDNA Synthesis Kit (10). Then, a  
 91 multiplex tiling PCR was conducted using Q5 High Fidelity Hot-Start DNA Polymerase (New  
 92 England Biolabs) and a DENV-2 sequencing primers scheme (3). Amplicons were purified using 1x  
 93 AMPure XP Beads and cleaned-up PCR product concentrations were measured using Qubit dsDNA  
 94 HS Assay Kit on a Qubit 3.0 fluorimeter (ThermoFisher). DNA library preparation was carried out  
 95 using the Ligation Sequencing Kit and the Native Barcoding Kit (NBD104, Oxford Nanopore  
 96 Technologies, Oxford, UK) (10). The purified PCR products were quantified and DNA concentrations  
 97 were normalized before barcoding reactions. Sequencing library was loaded onto a R9.4 flow cell,  
 98 and data were collected for up to 6 hours. Raw files were basecalled using Guppy and barcode  
 99 demultiplexing was performed using qcat software. Consensus sequences were generated by *de novo*  
 100 assembly using Genome Detective (<https://www.genomedetective.com/>) (11). A total of 32,315  
 101 mapped reads were obtained, resulting in a sequencing mean depth >1,000X and a coverage of >86%.  
 102 The DENV-2 Cosmopolitan genotype was identified. The newly sequence data obtained in this study  
 103 was deposited in GenBank, accession number OM744143.

104 To put the newly DENV-2 Cosmopolitan genotype sequence in a global context, we constructed  
 105 phylogenetic trees to explore the relationship of the sequenced genome to those of other isolates of  
 106 this genotype. We retrieved 1,087 DENV-2 genome sequences from this genotype with associated  
 107 lineage date and country of collection from GenBank, including the first 2 South American strains  
 108 isolated in Peru in 2019 (9). Sequences were aligned using MAFFT (12) and edited using AliView  
 109 (13). Those datasets were assessed for the presence of phylogenetic signal by applying the likelihood  
 110 mapping analysis implemented in the IQ-TREE 2 software (14). A maximum likelihood phylogeny  
 111 was reconstructed using IQ-TREE 2 software under the HKY+G4 substitution model (14). We  
 112 inferred time-scaled trees by using TreeTime (15).

Our phylogenetic analysis estimated by the DENV typing tool (available at <http://genomedetective.com/app/typingtool/dengue>), consistently place the Brazilian strain in a clade within the Cosmopolitan lineage with maximum statistical support (bootstrap = 100%) (**Figure S1**). Time-resolved maximum likelihood trees showed that the new isolate obtained in this study clusters with two recently described DENV-2 strains isolated in Peru in 2019 (strong bootstrap support of 96%) (**Figure 1 A-C**), suggesting a possible cross-border transmission. This cluster containing the South American isolates diverges from strains from Bangladesh collected between 2017-2019 (bootstrap support 1.0), suggesting a complex transmission scenario of introduction events likely mediated by trans-continental travel (**Figure 1 A-C**). Additional sampling of the region is needed to accurately reconstruct the routes of importation and transmission dynamics into Brazil and South America and the epidemiological impact upon the spread of the Cosmopolitan genotype.

## Conclusions

The emergence of the DENV-2 Cosmopolitan genotype in the Americas merits active outbreak risk assessment and surveillance across the region to prevent further spread and reduce epidemic potential.

## Ethics statement

This project was reviewed and approved by the Pan American Health Organization Ethics Review Committee (PAHOERC) (Ref. No. PAHO-2016-08-0029) and by the Federal University of Minas Gerais (CEP/CAAE: 32912820.6.1001.5149). The availability of these samples for research purposes during outbreaks of national concern is allowed to the terms of the 510/2016 Resolution of the National Ethical Committee for Research – Brazilian Ministry of Health (CONEP - Comissão Nacional de Ética em Pesquisa, Ministério da Saúde), that authorize, without the necessity of an informed consent, the use of clinical samples collected in the Brazilian Central Public Health Laboratories to accelerate knowledge building and contribute to surveillance and outbreak response. The sample processed in this study was obtained anonymously from material exceeding the routine diagnosis of arboviruses in Brazilian public health laboratories that belong to the public network within BrMoH.

141

## 142 **Biographical sketch**

143 Dr. Giovanetti is a Visiting Researcher at the Reference laboratory of Flavivirus, Fiocruz Rio de  
144 Janeiro, Southeast Brazil. Her research focuses on investigating the patterns of gene flow in pathogen  
145 populations, focusing in phylogenetics and phylogeography as tools to recreate and understand the  
146 determinants of viral outbreaks and how this information can be translated into public policy  
147 recommendations.

148

## 149 **Acknowledgement**

150 This work was support in part through National Institutes of Health USA grant U01 AI151698 for the  
151 United World Antiviral Research Network (UWARN), the National Council for Scientific  
152 Development- CNPq (421598/2018-2) and by the Brazilian Ministry of Health (SCON2021-00180).  
153 MG and LCJA are supported by Fundação de Amparo a Pesquisa do Estado do Rio de Janeiro  
154 (FAPERJ). Peru DENV 2 sequences were obtained in the frame of the PAHO VIGENDA project (  
155 Vigilancia GEnomica de Dengue en las Americas as per is acronym in Spanish).

156

## 157 **Author contributions**

158 Conception and design: MG; and LCJA; Investigations: MG; LAP; GAS; VF; MPGM; CdO; LdM;  
159 JX; ST; HF; EdCB; ESR; DFR; CPR; OCR; ANM; FdBN; Data Analysis: MG; VF; LdM; and GB;  
160 Writing – Original: MG and LCJA; Draft Preparation: MG; GAS; MPGM; LF; JAMMR; JLMJ; and  
161 LCJA; Revision: MG; LAP; GAS; VF; MPGM; CdO; LdM; JX; ST; HF; EdCB; ESR; DFR; CPR;  
162 OCR; AFM; FdBN; RVdC; AMBdF; CF; CRLP; CFCdA; LF; JAMR; JLMJ; VLdS; and LCJA;  
163 Resources: LAP; AFM; MPGM; AMBdF; RVdC; VLdS, CFCdA; CRLP; CF; JAMMR; JLMJ; and  
164 LCJA.

165

## 166 **Figure legend**

167 **Figure 1. Investigation of DENV-2 Cosmopolitan genotype in Brazil.** A) Maximum likelihood  
168 (ML) phylogenetic analysis including the newly complete genome sequence from DENV-2

Cosmopolitan genotype generated in this study plus 1,089 publicly available sequences from GenBank. The scale bar is in units of nucleotide substitutions per site (s/s) and the tree is mid-pointed rooted. Colors represent different sampling locations. B) Map of Brazil and Americas showing sampling location of the first DENV-2 Cosmopolitan genotype genome reported in Brazil and characterized in this study (white circles); C) Time-resolved maximum likelihood tree showing the DENV-2 Cosmopolitan cluster containing the newly genome generated in this study. Colors indicate geographic location of sampling. Support for branching structure is shown by bootstrap values at key nodes.

## References

1. Brathwaite Dick O, San Martín JL, Montoya RH, del Diego J, Zambrano B, Dayan GH. The history of dengue outbreaks in the Americas. *Am J Trop Med Hyg.* 2012; 87:584-93. <http://dx.doi.org/10.4269/ajtmh.2012.11-0770>.
2. Cuypers L, Libin PJK, Simmonds P, Nowé A, Muñoz-Jordán J, Alcantara LCJ, et al. Time to Harmonize Dengue Nomenclature and Classification. *Viruses.* 2018;18:10:5-6. <http://dx.doi.org/10.3390/v10100569>.
3. Adelino TÉR, Giovanetti M, Fonseca V, Xavier J, de Abreu ÁS, do Nascimento VA, et al. Field and classroom initiatives for portable sequence-based monitoring of dengue virus in Brazil. *Nat Commun.* 2021;16:12-2296. <http://dx.doi.org/doi:10.1038/s41467-021-22607-0>.
4. Forshey BM, Reiner RC, Olkowski S, Morrison AC, Espinoza A, Long KC, et al. Incomplete Protection against Dengue Virus Type 2 Re-infection in Peru. *PLoS Negl Trop Dis.* 2016;5:10-398. <http://dx.doi.org/doi:10.1371/journal.pntd.0004398>.

192 5. Rico-Hesse R, Harrison LM, Salas RA, Tovar D, Nisalak A, Ramos C, et al. Origins of dengue type  
193 2 viruses associated with increased pathogenicity in the Americas. *Virology*. 1997;14:244-51.  
194 <http://dx.doi.org/doi:10.1006/viro.1997.8504>.

195 6. Yenamandra SP, Koo C, Chiang S, Lim HSJ, Yeo ZY, Ng LC, et al. Evolution, heterogeneity and  
196 global dispersal of cosmopolitan genotype of Dengue virus type 2. *Sci Rep*. 2021;11:13-496.  
197 <http://dx.doi.org/doi:10.1038/s41598-021-92783-y>.

198 7. Ayolabi CI, Olusola BA, Ibemgbo SA, Okonkwo GO. Detection of Dengue viruses among febrile  
199 patients in Lagos, Nigeria and phylogenetics of circulating Dengue serotypes in Africa. *Infect Genet*  
200 *Evol*. 2019;75:103-947. <http://dx.doi.org/doi:10.1016/j.meegid.2019.103947>.

201 8. Suzuki K, Phadungsombat J, Nakayama EE, Saito A, Egawa A, Sato T, et al. Genotype  
202 replacement of dengue virus type 3 and clade replacement of dengue virus type 2 genotype  
203 Cosmopolitan in Dhaka, Bangladesh in 2017. *Infect Genet Evol*. 2019;75:103-977.  
204 <http://dx.doi.org/doi:10.1016/j.meegid.2019.103977>.

205 9. Paquita García M, Padilla C, Figueroa D, Manrique C, Cabezas C. Emergence of the Cosmopolitan  
206 genotype of dengue virus serotype 2 (denv2) in Madre de Dios, Peru, 2019. *Rev Peru Med Exp Salud*  
207 *Publica*. 2022;39:1-11. <http://dx.doi.org/doi:10.17843/rpmpesp.2022.391.10861>.

208 10. Quick J, Grubaugh ND, Pullan ST, Claro IM, Smith AD, Gangavarapu K, et al. Multiplex PCR  
209 method for MinION and Illumina sequencing of Zika and other virus genomes directly from clinical  
210 samples. *Nat Protoc*. 2017;12:1261-1276. <http://dx.doi.org/doi:10.1038/nprot.2017.066>.

211 11. Vilsker M, Moosa Y, Nooij S, Fonseca V, Ghysens Y, Dumon K, et al. Genome Detective: an  
212 automated system for virus identification from high-throughput sequencing data. *Bioinformatics*.  
213 2019;35:871-873. <http://dx.doi.org/doi:10.1093/bioinformatics/bty695>.



214 12. Katoh K, Standley DM. MAFFT multiple sequence alignment software version 7: improvements  
 215 in performance and usability. Mol Biol Evol. 2013; 30:772-80.  
 216 <http://dx.doi.org/doi:10.1093/molbev/mst010>.

217 13. Larsson A. AliView: a fast and lightweight alignment viewer and editor for large datasets.  
 218 Bioinformatics. 2014;15: 3276-8. <http://dx.doi.org/doi:10.1093/bioinformatics/btu531>.

219 14. Minh BQ, Schmidt HA, Chernomor O, Schrempf D, Woodhams MD, von Haeseler A, et al. IQ-  
 220 TREE 2: New Models and Efficient Methods for Phylogenetic Inference in the Genomic Era. Mol  
 221 Biol Evol. 2020;37:1530-1534. <http://dx.doi.org/doi:10.1093/molbev/msaa015>.

222 15. Sagulenko P, Puller V, Neher RA. TreeTime: Maximum-likelihood phylodynamic analysis. Virus  
 223 Evol. 2018;8:4:1-11. <http://dx.doi.org/doi:10.1093/ve/vex042>.

224

## 225 **Supporting information**

226 **Supplementary Figure 1. DENV-2 genotyping assessment.** Maximum Likelihood phylogeny  
 227 comprising the newly genome sequence (highlighted in red) generated in this study plus 37 sequences  
 228 retrieved from NCBI belonging to all DENV-2 non-sylvatic genotypes (DENV-2 Genotype I –  
 229 American; DENV-2 Genotype II – Cosmopolitan; DENV-2 Genotype III - Southern Asian-American;  
 230 DENV-2 Genotype IV - Asian II; DENV-2 Genotype V - Asian I). Dengue 2 virus genotypes are  
 231 coloured according to the legend.

232

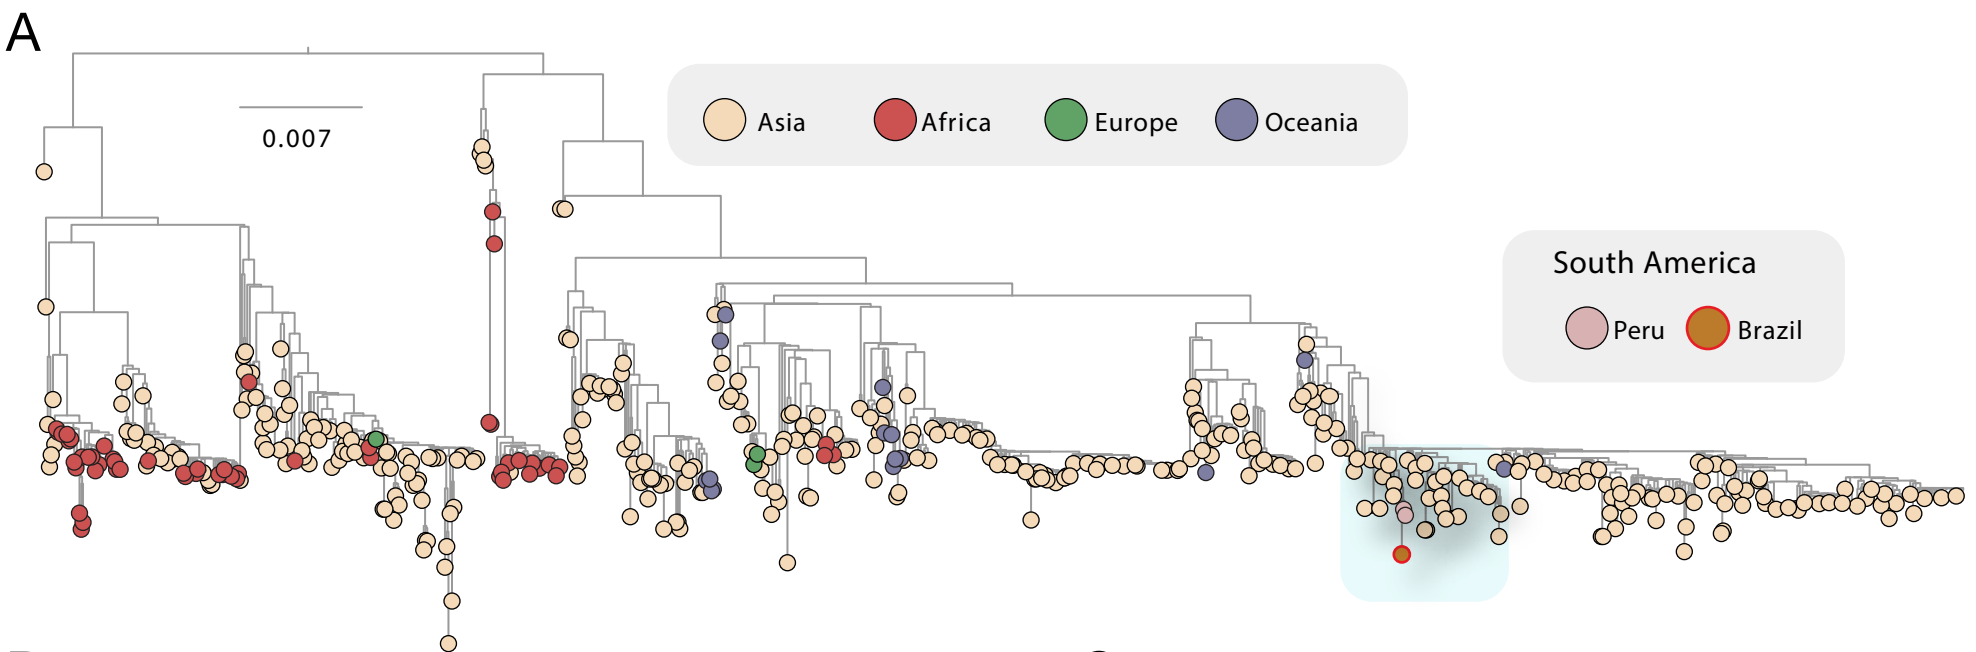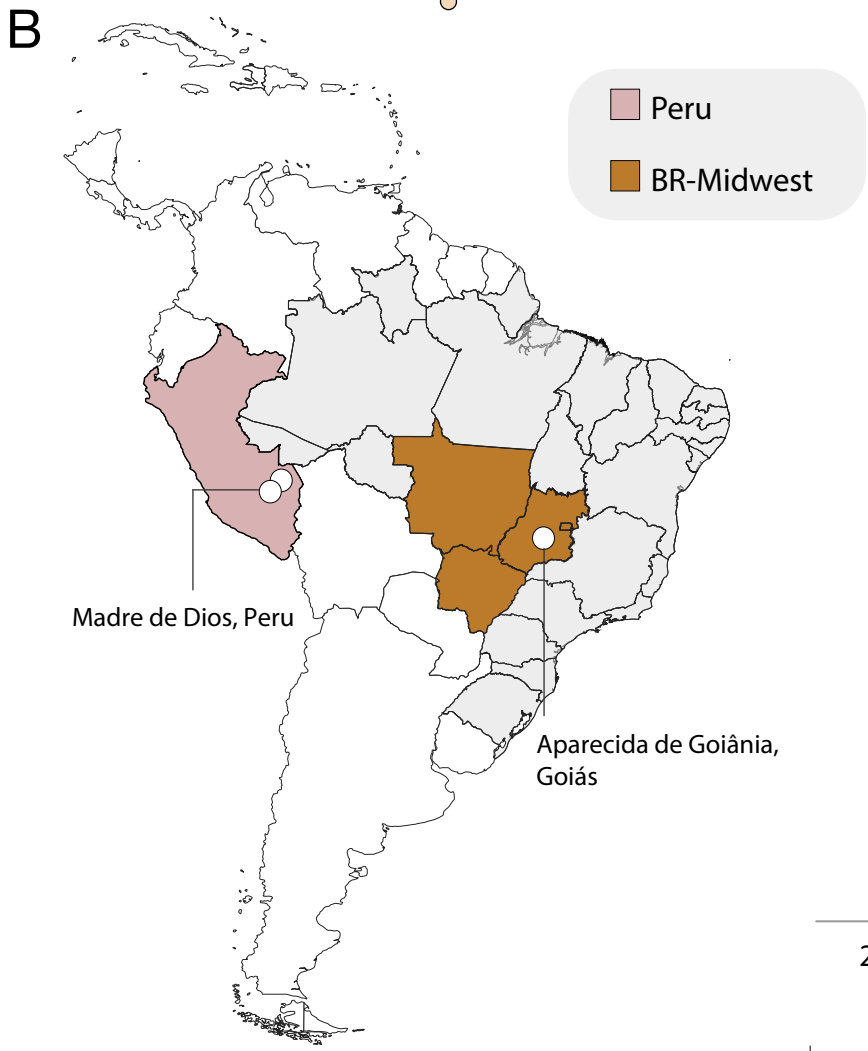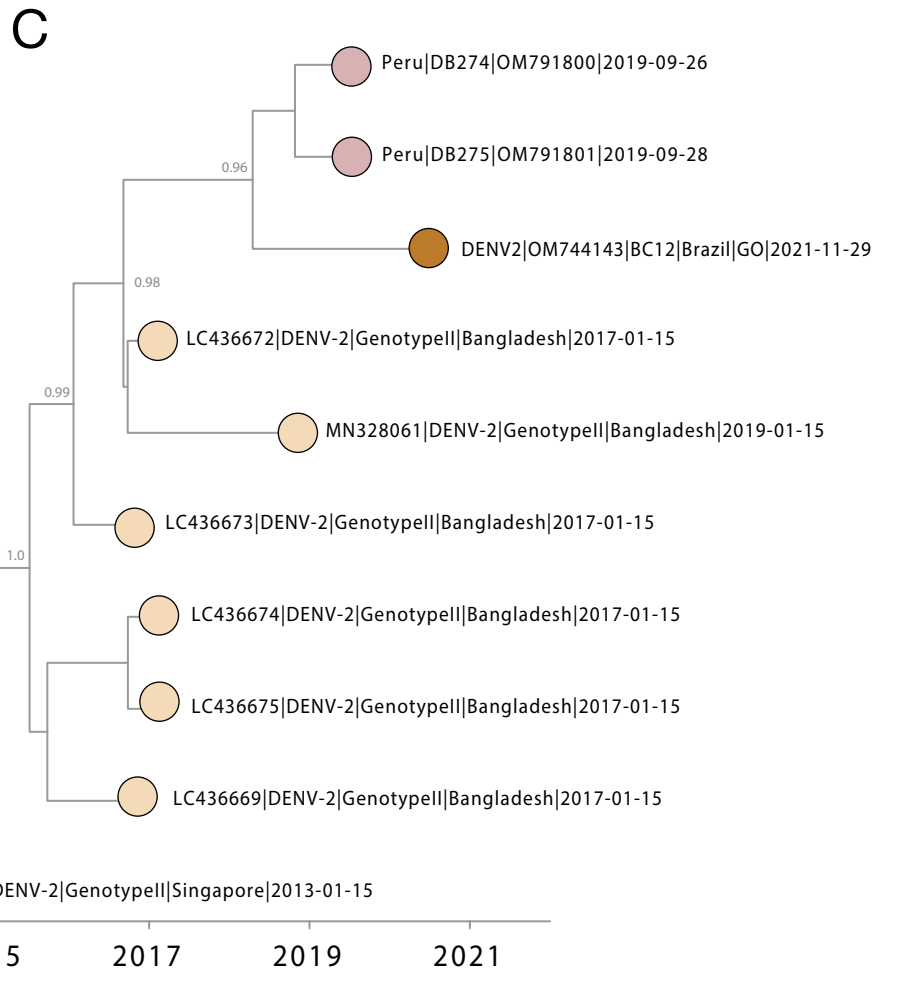

- Genotype I - American
- Genotype II - Cosmopolitan
- Genotype III - Southeast Asian-American
- Genotype IV - Asian II
- Genotype V - Asian I

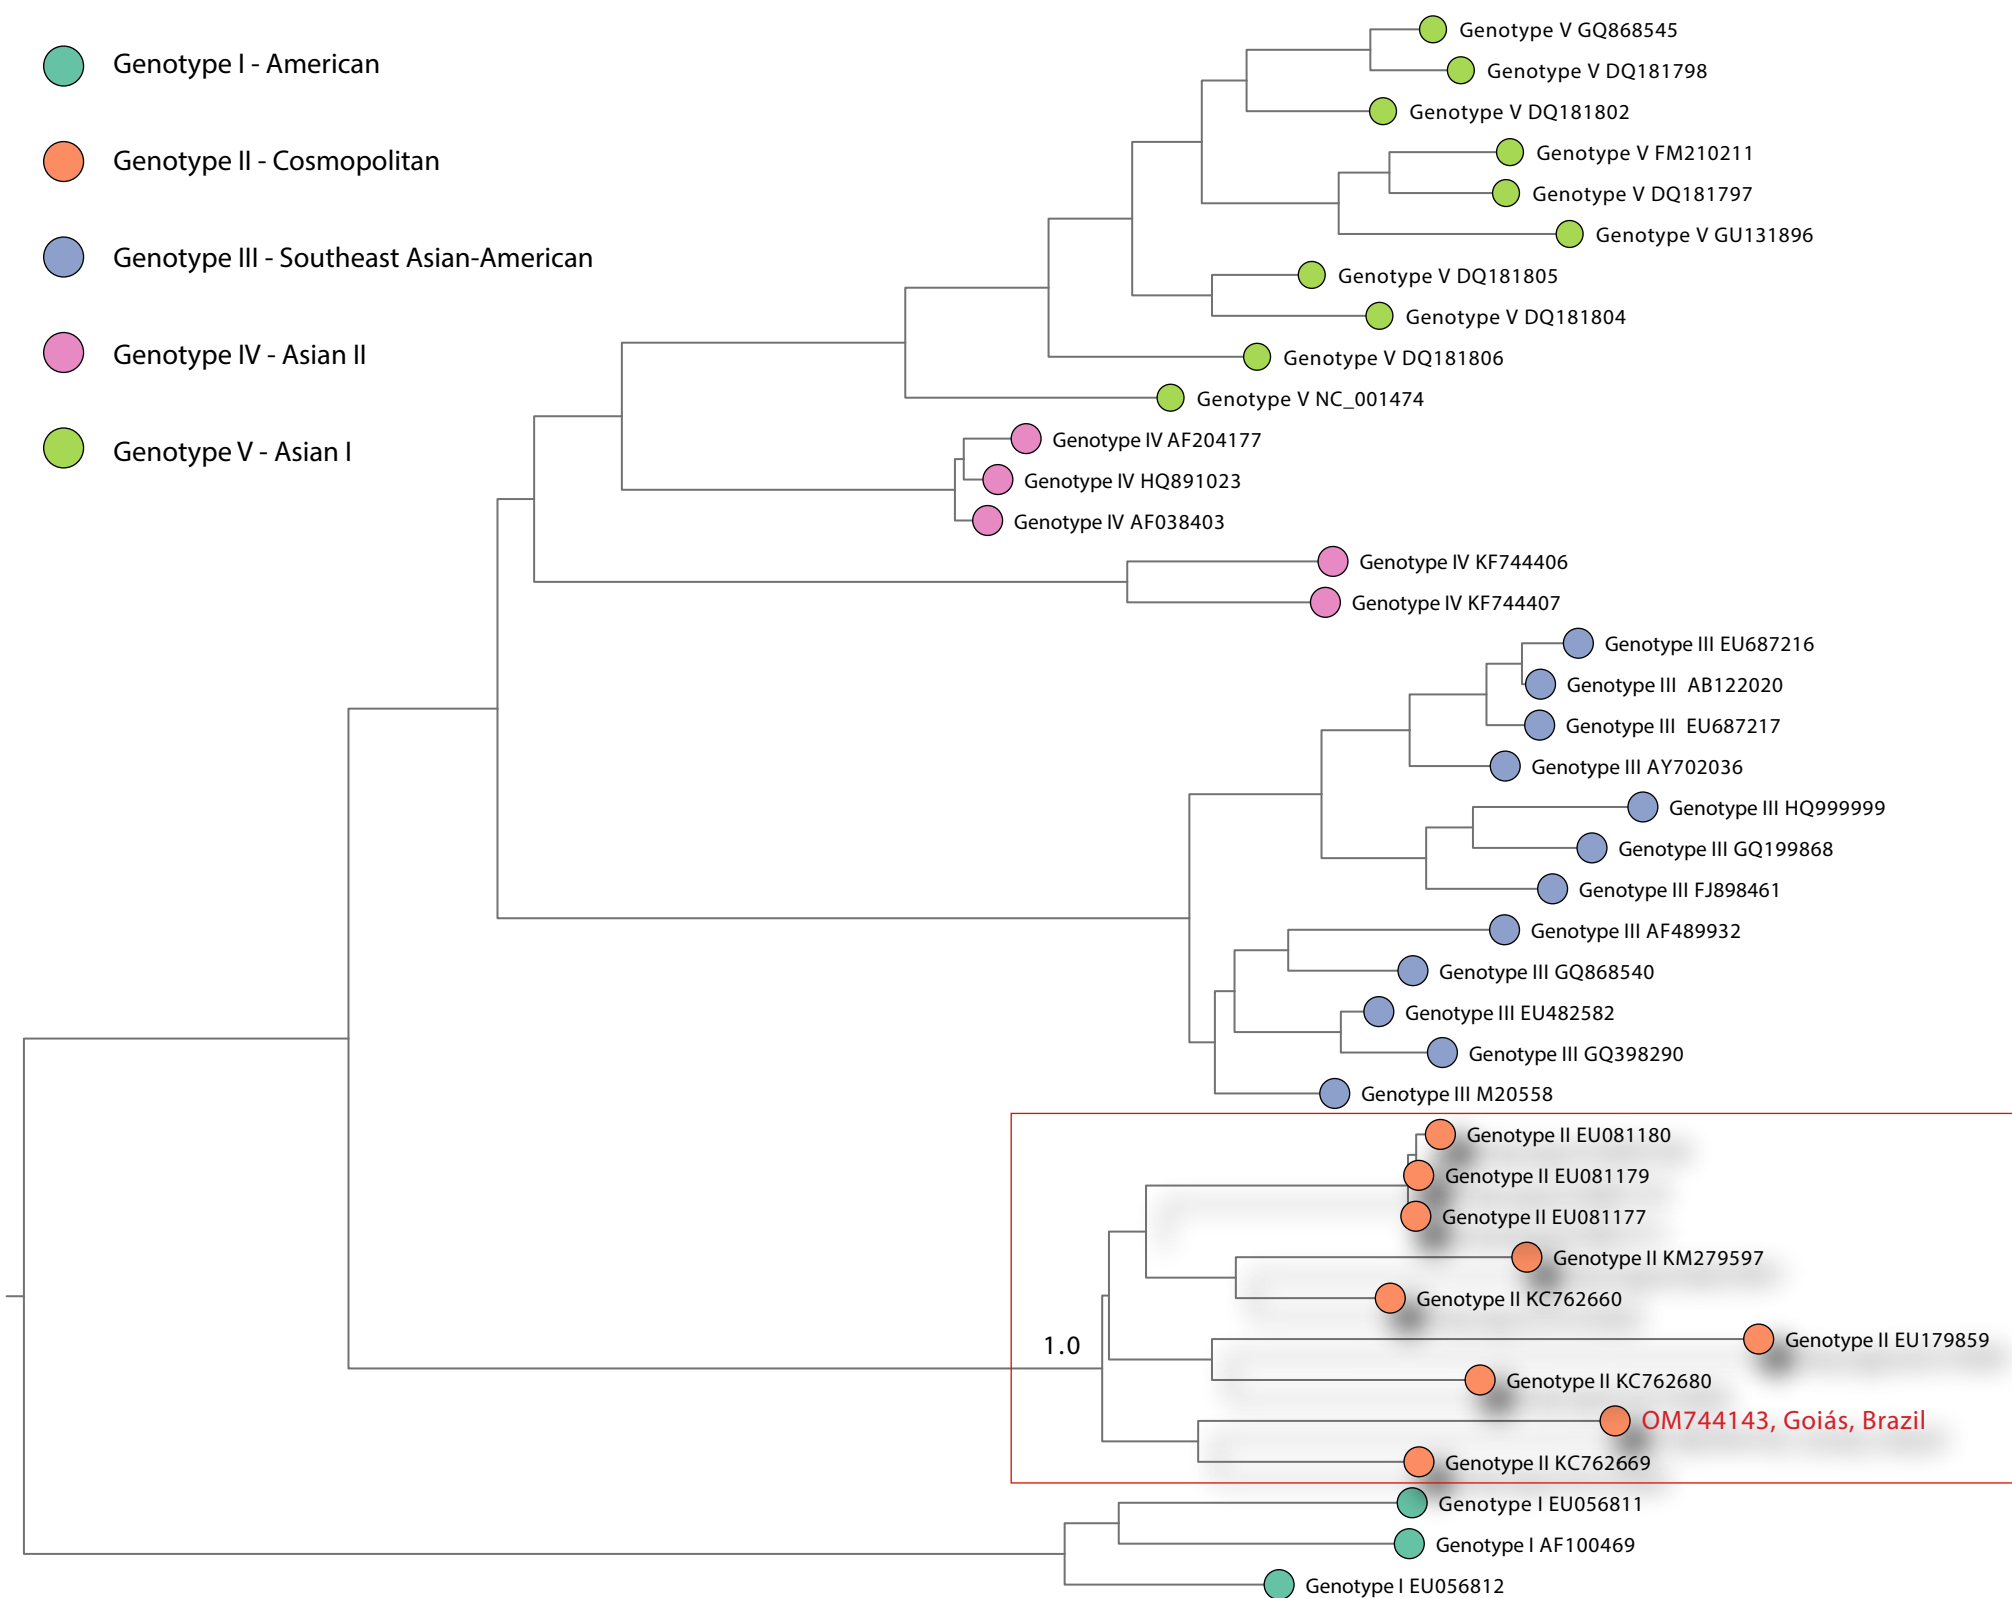

Source: http://medrxiv.stage.highwire.org/content/10.1101/2022.03.29.22273028v1.full.pdf
